# Supplementary material
Source: PubMed Central journal article supplement (PMC3214909)
Supplement: cdd201156x1.pdf [file cdd201156x1.pdf]

**IKK $\alpha$  represses a network of inflammation and proliferation pathways and elevates c-Myc antagonists and differentiation in a dose-dependent manner in the skin**

Bigang Liu, Jami Willette-Brown, Shuang Liu, Xin Chen, Susan M Fischer, and Yinling Hu

**Supplemental Figure Legends**

**Supplemental Figure 1**

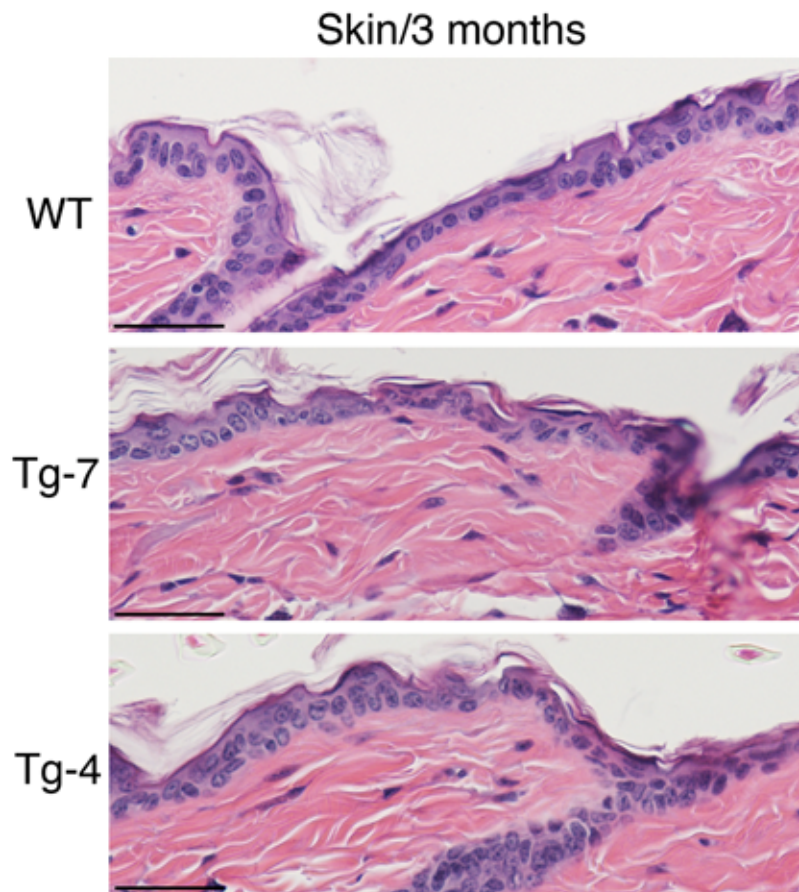

**Supplemental Figure 1** Skin morphology of WT, Tg-7, and Tg-4 mice at 3 months old.

Paraffin-embedded skin sections were stained with H&E. Scale bars = 150  $\mu$ m.

## Supplemental Figure 2

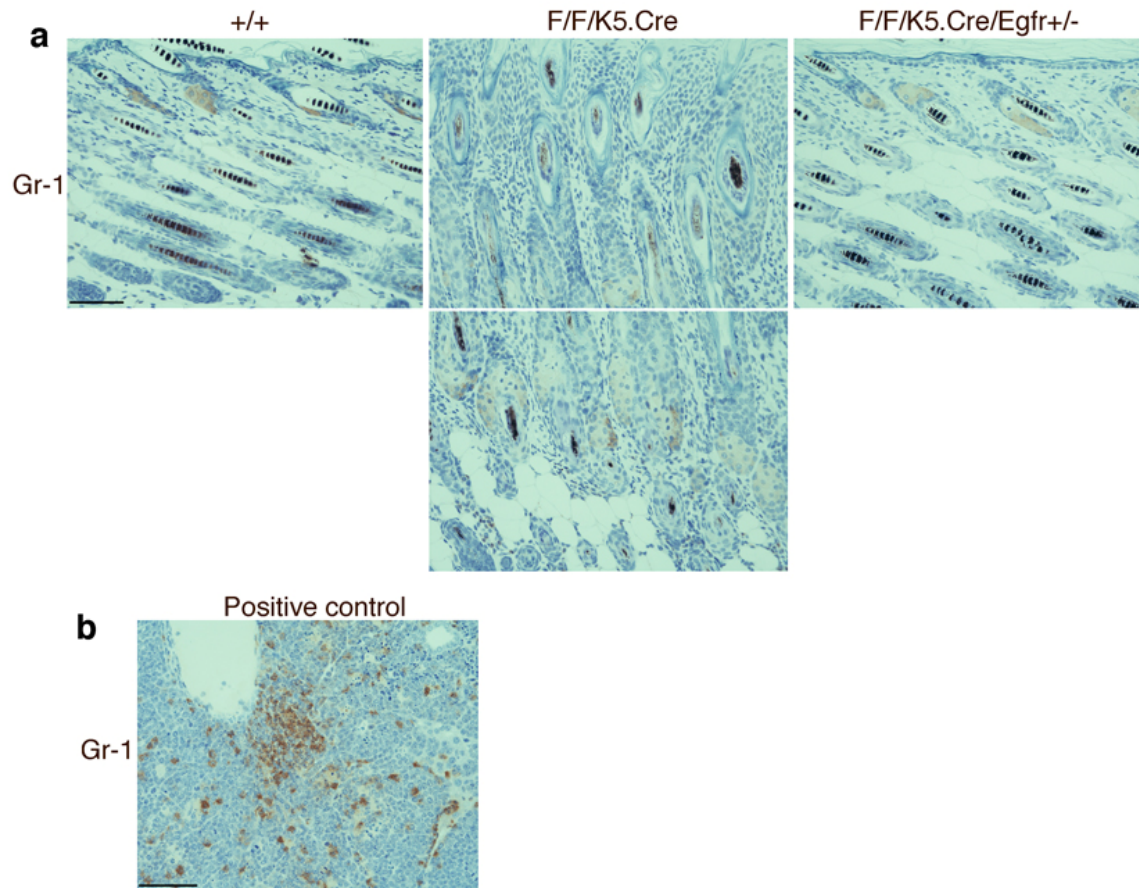

**Supplemental Figure 2** Detect Gr-1 cells in the skin. (a) Gr-1 cells in the skin sections of WT (*+/+*), *Ikk $\alpha$ <sup>F/F</sup>/K5.Cre* (*F/F/K5.Cre*), and *Ikk $\alpha$ <sup>F/F</sup>/K5.Cre/Egfr<sup>+/-</sup>* (*F/F/K5.Cre/Egfr<sup>+/-</sup>*) mice were detected by immunohistochemical staining. Blue color indicates hematoxylin counterstaining. Scale bars = 200 $\mu$ m. (b) Positive control (mouse liver with leukemia) for Gr-1 staining.

### Supplemental Figure 3

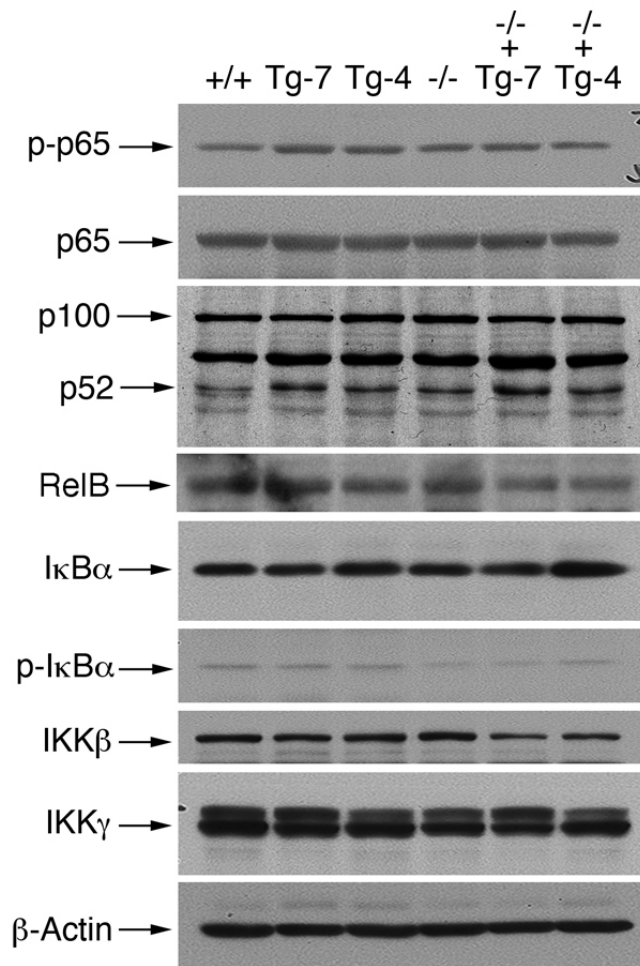

**Supplemental Figure 3** IKK and NF-κB family levels in the skin of WT, Tg-7, Tg-4, *Ikkα*<sup>-/-</sup> (-/-), Tg-7/*Ikkα*<sup>-/-</sup>, and Tg-4/*Ikkα*<sup>-/-</sup> newborn mice. The indicated protein levels were detected using Western blotting. β-Actin was used as a loading control.
